# Supplementary material for: Preventing and Treating Pain and Anxiety during Needle-Based Procedures in Children with Cancer in Low- and Middle-Income Countries
Source: MDPI journal article supplement (doi:10.3390/cancers16051025), 2024-03-01
Supplement: s1 [file s1]

**Supplemental Tables and Figures:**

# **Preventing and Treating Pain and Anxiety during Needle-Based Procedures in Children with Cancer in Low- and Middle-Income Countries**

Michael J. McNeil <sup>1,2,\*</sup>, Ximena Garcia Quintero <sup>1</sup>, Miriam Gonzalez <sup>1</sup>, Yawen Zheng <sup>1</sup>,  
Cecilia Ugaz Olivares <sup>3</sup>, Roxana Morales <sup>3</sup>, Erica Boldrini <sup>4</sup>, Débora Rebollo de Campos <sup>4</sup>,  
Daiane Ferreira <sup>4</sup>, Kamalina Coopasamy <sup>5</sup>, Joliza Caneba <sup>6</sup>, Maria Louisa Padernilla <sup>6</sup>,  
Stefan Friedrichsdorf <sup>7</sup>, Justin N. Baker <sup>8</sup> and Paola Friedrich <sup>1</sup>

**Table of Contents**

| <b>Item</b>                                                                                                   | <b>Page</b> |
|---------------------------------------------------------------------------------------------------------------|-------------|
| <b>Supplemental Figure S1: Patient/Parent Satisfaction Card</b>                                               | 2           |
| <b>Supplemental Figure S2: Provider Self Report Form</b>                                                      | 3           |
| <b>Supplemental Figure S3: Auditing Form</b>                                                                  | 4           |
| <b>Supplemental Table S1: Outcome, Process, Balance Measures</b>                                              | 6           |
| <b>Supplemental Figure S4: Patient/Parent Report of Pain During Procedure</b>                                 | 6           |
| <b>Supplemental Table S2: Patient/Parent Satisfaction</b>                                                     | 7           |
| <b>Supplemental Figure S5: Patient Experience for Patient in Philippines</b>                                  | 7           |
| <b>Supplemental Figure S6A: Self-Reported Percentage Use of Sucrose or Breastfeeding<br/>When Appropriate</b> | 7           |
| <b>Supplemental Figure S6B: Self-Reported Percentage Use of Topical Anesthesia</b>                            | 8           |
| <b>Supplemental Table S3: Number of Comfort Promise Interventions</b>                                         | 8           |
| <b>Supplemental Figure S7A: Average needlestick procedure duration time</b>                                   | 9           |
| <b>Supplemental Figure S7B: Average Attempts Per Patient Encounter</b>                                        | 9           |
| <b>Supplemental Table S4: Provider Satisfaction</b>                                                           | 10          |

**Supplemental Figure S1 Patient/Parent Satisfaction Card**

Institutional  
Logo Here

## The Comfort Promise

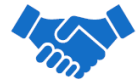

1. What is your child's age? \_\_\_\_\_ (years) \_\_\_\_\_ (months)

2. Was your child in pain?

☐

Yes

☐

No

2. If Yes, do you think the hospital staff did everything they could to help prevent or alleviate the pain?

☐

Yes, definitely

☐

Yes, to some extent

☐

No

3. Where was the needle stick performed?

☐

Inpatient unit

☐

Outpatient clinic

4. Roughly, how many minutes did you have to wait for this needle-stick? \_\_\_\_\_ minutes

Date: MM / DD / YY  
Time: \_\_\_\_\_ AM PM  
Weekday: ☐  
Weekend: ☐

Supplemental Figure S2 Provider Self-Report Form:

Institution  
Logo

# The Comfort Promise

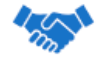

|                |                                                                                                                                                            |
|----------------|------------------------------------------------------------------------------------------------------------------------------------------------------------|
| Facility code: | Date/Time: MM/DD/YYYY (hh:mm)                                                                                                                              |
| Type of Unit:  | <input type="checkbox"/> Inpatient <input type="checkbox"/> Outpatient                                                                                     |
| Your role:     | <input type="checkbox"/> Nurse <input type="checkbox"/> Physician <input type="checkbox"/> Phlebotomist<br><input type="checkbox"/> Other (specify): _____ |

|                                                                                                           |
|-----------------------------------------------------------------------------------------------------------|
| Patient Age: Child age _____ (years) _____ (months)                                                       |
| Needle Stick Performed <input type="checkbox"/> Lab Draw <input type="checkbox"/> Peripheral IV Placement |
| How many attempts did it take? _____                                                                      |

|                                                                   |                                                                                       |
|-------------------------------------------------------------------|---------------------------------------------------------------------------------------|
| Were age-appropriate positioning techniques used?                 | <input type="checkbox"/> Yes <input type="checkbox"/> No                              |
| Were age-appropriate distraction techniques used?                 | <input type="checkbox"/> Yes <input type="checkbox"/> No                              |
| Was a topical anesthetic used?                                    | <input type="checkbox"/> Yes <input type="checkbox"/> No                              |
| Was sucrose or breastfeeding used for infant less than 12 months? | <input type="checkbox"/> Yes <input type="checkbox"/> No <input type="checkbox"/> N/A |

|                                                    |                                                                                                                                                               |
|----------------------------------------------------|---------------------------------------------------------------------------------------------------------------------------------------------------------------|
| Start time for the procedure:                      | _____                                                                                                                                                         |
| End time for the procedure:                        | _____                                                                                                                                                         |
| Was the procedure successful?                      | <input type="checkbox"/> Yes <input type="checkbox"/> No                                                                                                      |
| How satisfied are you with how the procedure went? | <input type="checkbox"/> Very Satisfied <input type="checkbox"/> Satisfied <input type="checkbox"/> Somewhat Satisfied <input type="checkbox"/> Not Satisfied |

## Supplemental Figure S3 Auditing Form

Institution  
Logo

## The Comfort Promise

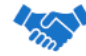

|                                                                                                                                                                         |                                                                          |
|-------------------------------------------------------------------------------------------------------------------------------------------------------------------------|--------------------------------------------------------------------------|
| Facility code: _____                                                                                                                                                    | Date/Time: MM/DD/YYYY (hh:mm) _____                                      |
| Type of Unit: <input type="checkbox"/> Inpatient <input type="checkbox"/> Outpatient                                                                                    | Shift: <input type="checkbox"/> Weekday <input type="checkbox"/> Weekend |
| Performer role: <input type="checkbox"/> Nurse <input type="checkbox"/> Physician <input type="checkbox"/> Phlebotomist <input type="checkbox"/> Other (specify): _____ |                                                                          |
| Observer role: <input type="checkbox"/> Nurse <input type="checkbox"/> Physician <input type="checkbox"/> Phlebotomist <input type="checkbox"/> Other (specify): _____  |                                                                          |

### Availability

|                                                                                   |                                                          |
|-----------------------------------------------------------------------------------|----------------------------------------------------------|
| Were topical anesthetics readily available in the clinical area?                  | <input type="checkbox"/> Yes <input type="checkbox"/> No |
| Were distraction supplies readily available in the clinical area?                 | <input type="checkbox"/> Yes <input type="checkbox"/> No |
| Were reminders, posters, or educational materials available in the clinical area? | <input type="checkbox"/> Yes <input type="checkbox"/> No |

### Needle-sticks Observations

| Obs | Component                                                                                                                                                                                                                                                                                                               | Obs | Component                                                                                                                                                                                                                                                                                                               |
|-----|-------------------------------------------------------------------------------------------------------------------------------------------------------------------------------------------------------------------------------------------------------------------------------------------------------------------------|-----|-------------------------------------------------------------------------------------------------------------------------------------------------------------------------------------------------------------------------------------------------------------------------------------------------------------------------|
| 1   | Child age _____ (years) _____ (months)<br><input type="checkbox"/> age-appropriate distractions techniques<br><input type="checkbox"/> age-appropriate positioning techniques<br><input type="checkbox"/> topical anesthesia<br><input type="checkbox"/> sucrose or breast feeding when appropriate<br>o All components | 2   | Child age _____ (years) _____ (months)<br><input type="checkbox"/> age-appropriate distractions techniques<br><input type="checkbox"/> age-appropriate positioning techniques<br><input type="checkbox"/> topical anesthesia<br><input type="checkbox"/> sucrose or breast feeding when appropriate<br>o All components |
| 3   | Child age _____ (years) _____ (months)<br><input type="checkbox"/> age-appropriate distractions techniques<br><input type="checkbox"/> age-appropriate positioning techniques<br><input type="checkbox"/> topical anesthesia<br><input type="checkbox"/> sucrose or breast feeding when appropriate<br>o All components | 4   | Child age _____ (years) _____ (months)<br><input type="checkbox"/> age-appropriate distractions techniques<br><input type="checkbox"/> age-appropriate positioning techniques<br><input type="checkbox"/> topical anesthesia<br><input type="checkbox"/> sucrose or breast feeding when appropriate<br>o All components |
| 5   | Child age _____ (years) _____ (months)<br><input type="checkbox"/> age-appropriate distractions techniques<br><input type="checkbox"/> age-appropriate positioning techniques<br><input type="checkbox"/> topical anesthesia<br><input type="checkbox"/> sucrose or breast feeding when appropriate<br>o All components | 6   | Child age _____ (years) _____ (months)<br><input type="checkbox"/> age-appropriate distractions techniques<br><input type="checkbox"/> age-appropriate positioning techniques<br><input type="checkbox"/> topical anesthesia<br><input type="checkbox"/> sucrose or breast feeding when appropriate<br>o All components |
| 7   | Child age _____ (years) _____ (months)<br><input type="checkbox"/> age-appropriate distractions techniques<br><input type="checkbox"/> age-appropriate positioning techniques<br><input type="checkbox"/> topical anesthesia<br><input type="checkbox"/> sucrose or breast feeding when appropriate<br>o All components | 8   | Child age _____ (years) _____ (months)<br><input type="checkbox"/> age-appropriate distractions techniques<br><input type="checkbox"/> age-appropriate positioning techniques<br><input type="checkbox"/> topical anesthesia<br><input type="checkbox"/> sucrose or breast feeding when appropriate<br>o All components |
| 9   | Child age _____ (years) _____ (months)<br><input type="checkbox"/> age-appropriate distractions techniques<br><input type="checkbox"/> age-appropriate positioning techniques<br><input type="checkbox"/> topical anesthesia<br><input type="checkbox"/> sucrose or breast feeding when appropriate<br>o All components | 10  | Child age _____ (years) _____ (months)<br><input type="checkbox"/> age-appropriate distractions techniques<br><input type="checkbox"/> age-appropriate positioning techniques<br><input type="checkbox"/> topical anesthesia<br><input type="checkbox"/> sucrose or breast feeding when appropriate<br>o All components |

| Calculating Adherence                      |                        |                          |                        |
|--------------------------------------------|------------------------|--------------------------|------------------------|
| Component                                  | Numerator <sup>1</sup> | Denominator <sup>2</sup> | Adherence <sup>3</sup> |
| Age-appropriate distractions techniques    |                        |                          |                        |
| Appropriate positioning techniques         |                        |                          |                        |
| Topical anesthesia                         |                        |                          |                        |
| Sucrose or breast feeding when appropriate |                        |                          |                        |
| All components                             |                        |                          |                        |

<sup>1</sup>Write the total number of providers who used each component during the needle-stick procedure.

<sup>2</sup> Write the total number of observations for that component; notice that some components are not applicable to all patients and depend on their age.

<sup>3</sup>Calculate by dividing the total of provider who used the component (numerator) by the total of observations(denominator) and multiply by 100.

### Parents Satisfaction Survey Interviews

| Int | Questions                                                                                                                                                                                                                                                                                                                                                                                                                                                       | Int |                                                                                                                                                                                                                                                                                                                                                                                                                                                                 |
|-----|-----------------------------------------------------------------------------------------------------------------------------------------------------------------------------------------------------------------------------------------------------------------------------------------------------------------------------------------------------------------------------------------------------------------------------------------------------------------|-----|-----------------------------------------------------------------------------------------------------------------------------------------------------------------------------------------------------------------------------------------------------------------------------------------------------------------------------------------------------------------------------------------------------------------------------------------------------------------|
| 1   | Child age _____ (years) _____ (months)<br>Parent reported pain <input type="checkbox"/> Yes <input type="checkbox"/> No<br>Hospital staff prevent or alleviate the pain:<br><input type="checkbox"/> Yes, definitely <input type="checkbox"/> Yes, to some extent <input type="checkbox"/> No<br>Unit where needle stick was performed:<br><input type="checkbox"/> Inpatient <input type="checkbox"/> Outpatient<br>Needle-stick waiting time: _____ (minutes) | 2   | Child age _____ (years) _____ (months)<br>Parent reported pain <input type="checkbox"/> Yes <input type="checkbox"/> No<br>Hospital staff prevent or alleviate the pain:<br><input type="checkbox"/> Yes, definitely <input type="checkbox"/> Yes, to some extent <input type="checkbox"/> No<br>Unit where needle stick was performed:<br><input type="checkbox"/> Inpatient <input type="checkbox"/> Outpatient<br>Needle-stick waiting time: _____ (minutes) |
| 3   | Child age _____ (years) _____ (months)<br>Parent reported pain <input type="checkbox"/> Yes <input type="checkbox"/> No<br>Hospital staff prevent or alleviate the pain:<br><input type="checkbox"/> Yes, definitely <input type="checkbox"/> Yes, to some extent <input type="checkbox"/> No<br>Unit where needle stick was performed:<br><input type="checkbox"/> Inpatient <input type="checkbox"/> Outpatient<br>Needle-stick waiting time: _____ (minutes) | 4   | Child age _____ (years) _____ (months)<br>Parent reported pain <input type="checkbox"/> Yes <input type="checkbox"/> No<br>Hospital staff prevent or alleviate the pain:<br><input type="checkbox"/> Yes, definitely <input type="checkbox"/> Yes, to some extent <input type="checkbox"/> No<br>Unit where needle stick was performed:<br><input type="checkbox"/> Inpatient <input type="checkbox"/> Outpatient<br>Needle-stick waiting time: _____ (minutes) |
| 5   | Child age _____ (years) _____ (months)<br>Parent reported pain <input type="checkbox"/> Yes <input type="checkbox"/> No<br>Hospital staff prevent or alleviate the pain:<br><input type="checkbox"/> Yes, definitely <input type="checkbox"/> Yes, to some extent <input type="checkbox"/> No<br>Unit where needle stick was performed:<br><input type="checkbox"/> Inpatient <input type="checkbox"/> Outpatient<br>Needle-stick waiting time: _____ (minutes) | 6   | Child age _____ (years) _____ (months)<br>Parent reported pain <input type="checkbox"/> Yes <input type="checkbox"/> No<br>Hospital staff prevent or alleviate the pain:<br><input type="checkbox"/> Yes, definitely <input type="checkbox"/> Yes, to some extent <input type="checkbox"/> No<br>Unit where needle stick was performed:<br><input type="checkbox"/> Inpatient <input type="checkbox"/> Outpatient<br>Needle-stick waiting time: _____ (minutes) |
| 7   | Child age _____ (years) _____ (months)<br>Parent reported pain <input type="checkbox"/> Yes <input type="checkbox"/> No<br>Hospital staff prevent or alleviate the pain:<br><input type="checkbox"/> Yes, definitely <input type="checkbox"/> Yes, to some extent <input type="checkbox"/> No<br>Unit where needle stick was performed:<br><input type="checkbox"/> Inpatient <input type="checkbox"/> Outpatient<br>Needle-stick waiting time: _____ (minutes) | 8   | Child age _____ (years) _____ (months)<br>Parent reported pain <input type="checkbox"/> Yes <input type="checkbox"/> No<br>Hospital staff prevent or alleviate the pain:<br><input type="checkbox"/> Yes, definitely <input type="checkbox"/> Yes, to some extent <input type="checkbox"/> No<br>Unit where needle stick was performed:<br><input type="checkbox"/> Inpatient <input type="checkbox"/> Outpatient<br>Needle-stick waiting time: _____ (minutes) |
| 9   | Child age _____ (years) _____ (months)<br>Parent reported pain <input type="checkbox"/> Yes <input type="checkbox"/> No<br>Hospital staff prevent or alleviate the pain:<br><input type="checkbox"/> Yes, definitely <input type="checkbox"/> Yes, to some extent <input type="checkbox"/> No<br>Unit where needle stick was performed:<br><input type="checkbox"/> Inpatient <input type="checkbox"/> Outpatient<br>Needle-stick waiting time: _____ (minutes) | 10  | Child age _____ (years) _____ (months)<br>Parent reported pain <input type="checkbox"/> Yes <input type="checkbox"/> No<br>Hospital staff prevent or alleviate the pain:<br><input type="checkbox"/> Yes, definitely <input type="checkbox"/> Yes, to some extent <input type="checkbox"/> No<br>Unit where needle stick was performed:<br><input type="checkbox"/> Inpatient <input type="checkbox"/> Outpatient<br>Needle-stick waiting time: _____ (minutes) |

**Supplemental Table S1: Outcome, Process, and Balance Measures for Global Comfort Promise**

| Outcome Measures                                                                                                                                | Process Measures                                                                                                                                                                                                                                                                                                                                                              | Balance Measures                                                                                                                                                                                                                                                                   |
|-------------------------------------------------------------------------------------------------------------------------------------------------|-------------------------------------------------------------------------------------------------------------------------------------------------------------------------------------------------------------------------------------------------------------------------------------------------------------------------------------------------------------------------------|------------------------------------------------------------------------------------------------------------------------------------------------------------------------------------------------------------------------------------------------------------------------------------|
| <ol style="list-style-type: none"> <li>1. Realtime Patient/Parent satisfaction</li> <li>2. Prevalence of Patient/Parent satisfaction</li> </ol> | <ol style="list-style-type: none"> <li>1. Frequency of use of the four Comfort Promise principles</li> <li>2. <i>Utilization of <math>\geq 2</math> principles per patient encounter (calculated)</i></li> <li>3. Frequency of availability of topical anesthetics in clinical area</li> <li>4. Frequency of availability of distraction supplies in clinical area</li> </ol> | <ol style="list-style-type: none"> <li>1. Length of time waiting for procedure to start</li> <li>2. Length of time the procedure takes</li> <li>3. Success rate of the procedure</li> <li>4. Number of attempts per patient encounter</li> <li>5. Provider satisfaction</li> </ol> |

**Supplemental Figure S4: Patient/Parent Reporting Pain After Real-Time Needlestick Procedure**

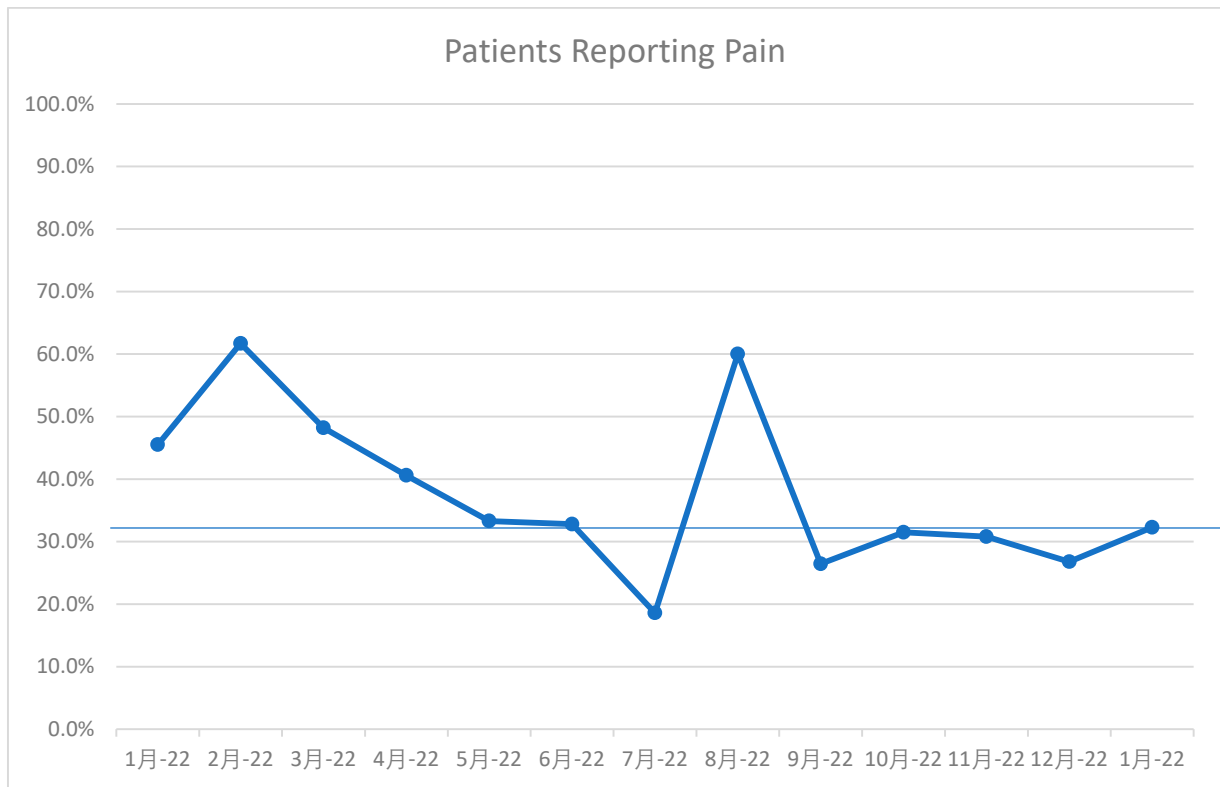

**Supplemental Table S2: Patient/Parent Satisfaction**

|                                            |              |
|--------------------------------------------|--------------|
| <b>Total</b>                               | <b>2199</b>  |
| <b>Pain Y/N</b>                            |              |
| Yes                                        | 743 (33.7%)  |
| No                                         | 1456 (66.3%) |
| <b>If Yes, Was the Pain Alleviated Y/N</b> |              |
| Yes, definitely                            | 702 (94.7%)  |
| Yes, to some extent                        | 40 (5.3%)    |

**Supplemental Figure S5:**

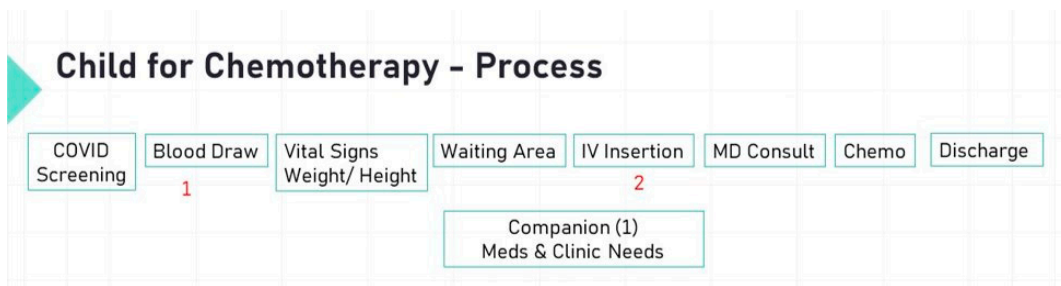

**Supplemental Figure S6A: Self-Reported Percentage Use of Sucrose or Breastfeeding When Appropriate**

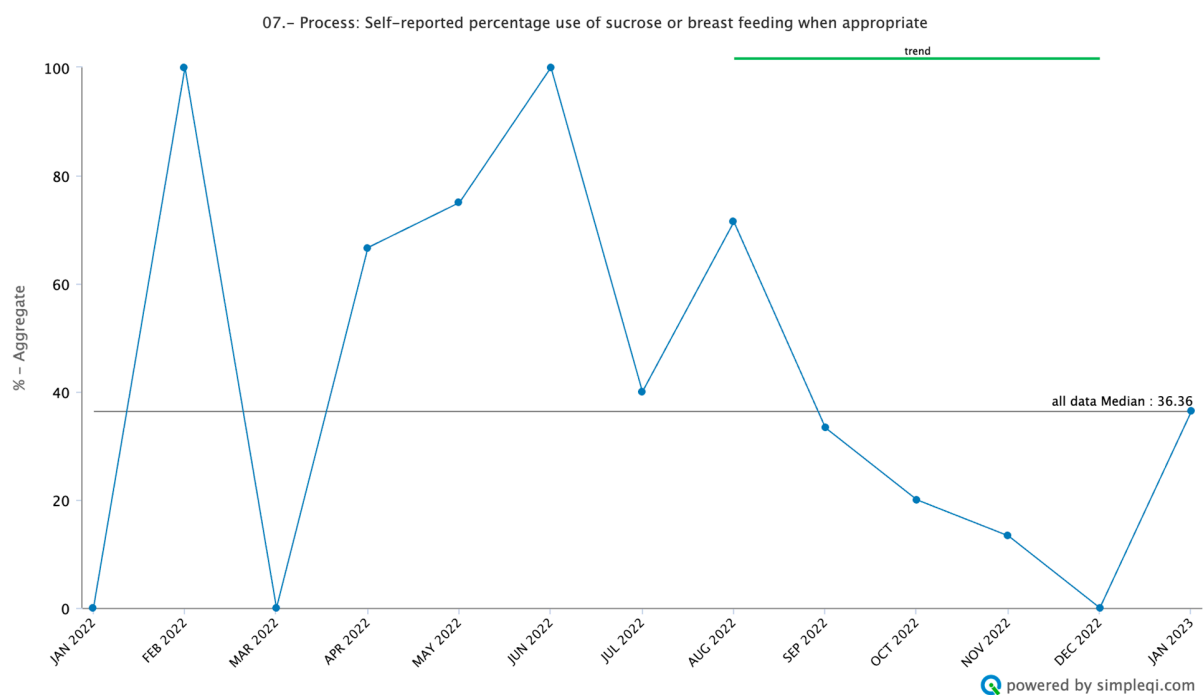

**Supplemental Figure S6A:** Percentage of healthcare professionals that recorded using sucrose or breastfeeding when appropriate during the needle-based procedure performed, over the total number of needle-based procedures performed. This data was collected each week and then aggregated into monthly data points for analysis.

**Supplemental Figure S6B Self-Reported Percentage Use of Topical Anesthesia**

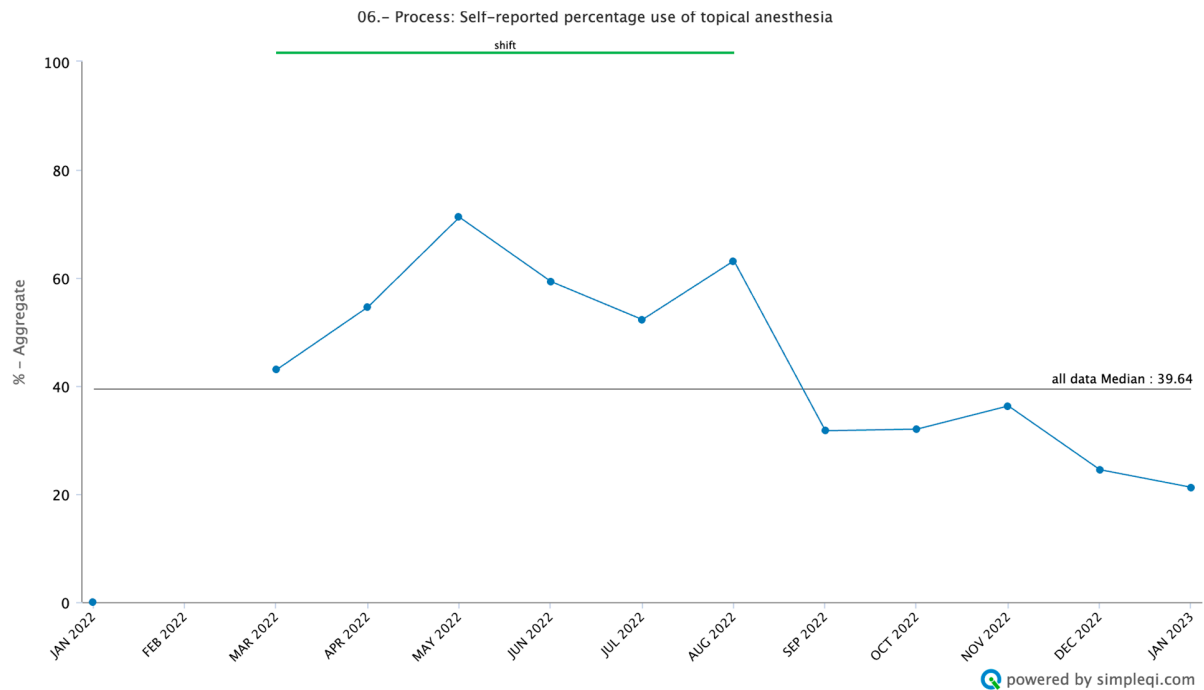

**Supplemental Figure S6B:** Percentage of healthcare professionals that recorded using anesthesia during the needle-based procedure performed, over the total number of needle-based procedures performed. This data was collected each week and then aggregated into monthly data points for analysis.

**Supplemental Table S3: Number of Comfort Promise Interventions**

| #Comfort Promise Principles | N           |
|-----------------------------|-------------|
| 1                           | 15          |
| 2                           | 1026        |
| 3                           | 1075        |
| 4                           | 69          |
| <b>TOTAL</b>                | <b>2185</b> |

\*Only children <2 had all 4 interventions.



### Supplemental Figure S7A: Average needlestick procedure duration time

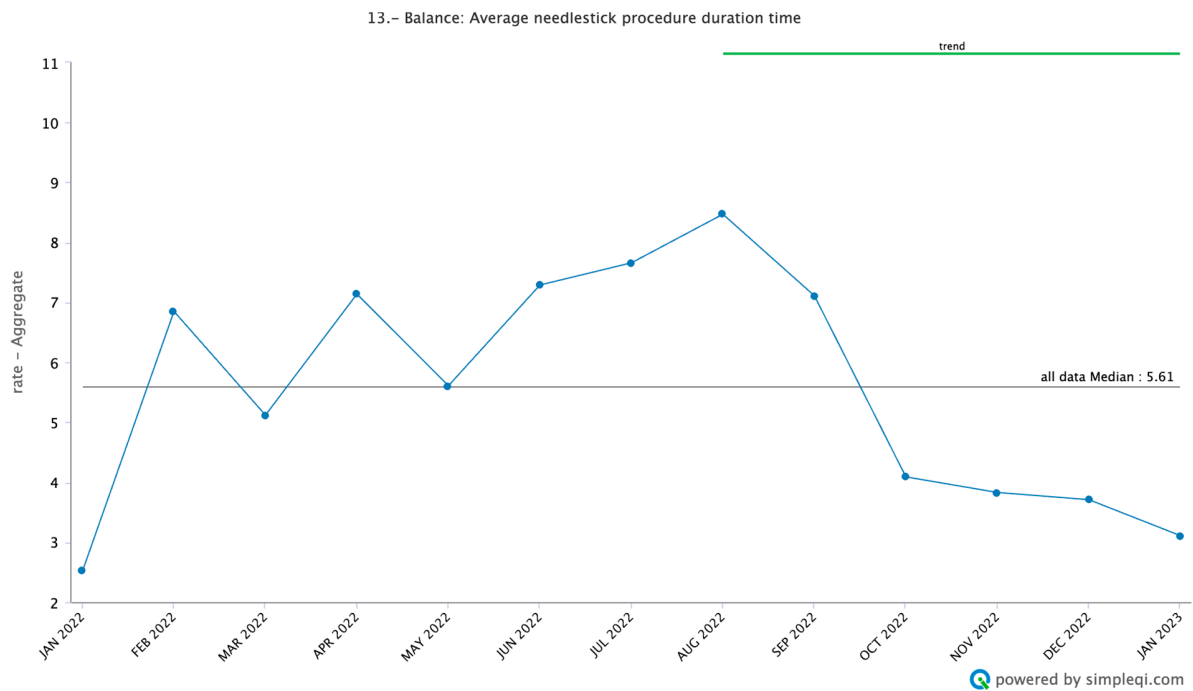

**Supplemental Figure S7A:** The time in minutes between procedure start and end time were recorded for each procedure. This was then recorded as a single number for each procedure. The average for each month was then obtained recorded in minutes.

### Supplemental Figure S7B: Average Attempts Per Patient Encounter

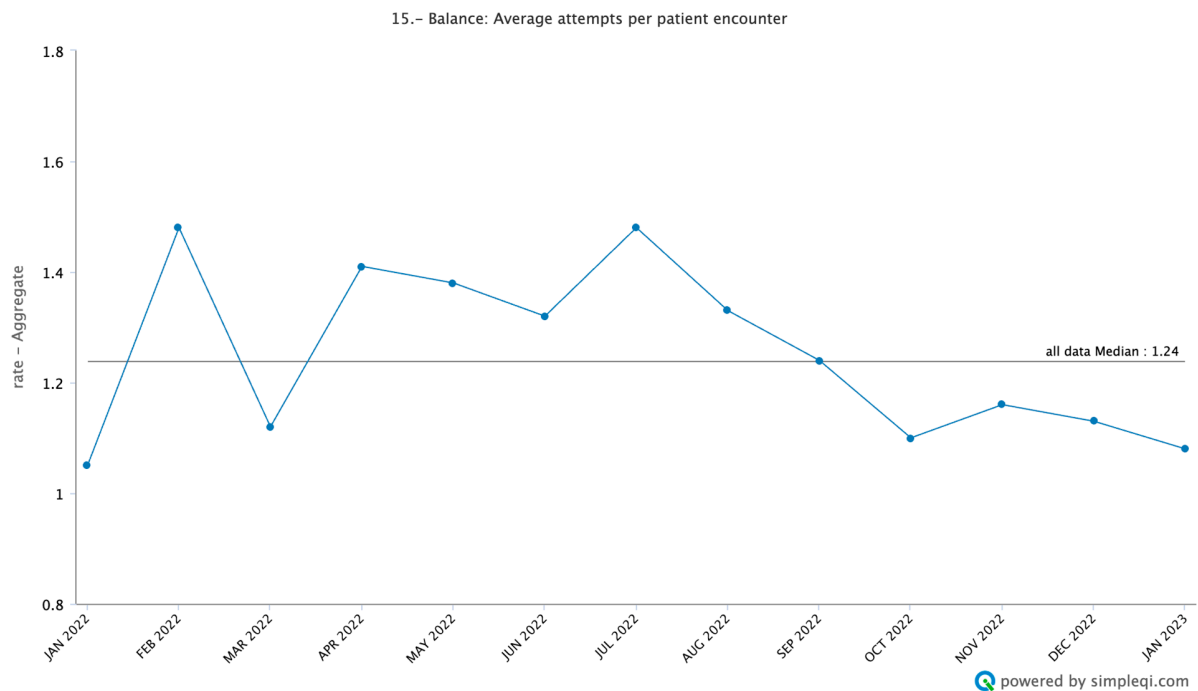

**Supplemental Figure S7B:** The number of attempts for the needlestick in minutes were recorded for each procedure. The average for each month was then obtained recorded.

**Supplemental Table S4:** Provider Satisfaction

| <b>Procedure Satisfaction</b> | <b>N</b>    | <b>%</b>      |
|-------------------------------|-------------|---------------|
| Very Satisfied                | 1632        | 74.60%        |
| Satisfied                     | 519         | 23.70%        |
| Somewhat Satisfied            | 28          | 1.28%         |
| Not Satisfied                 | 6           | 0.27%         |
| <b>TOTAL</b>                  | <b>2185</b> | <b>99.85%</b> |
